# Supplementary material for: The Impact of Prolonged Inflammation on Wound Healing
Source: Biomedicines. 2022 Apr 6;10(4):856. doi: 10.3390/biomedicines10040856 (PMC9025535; doi:10.3390/biomedicines10040856)
Supplement: Supplementary file 1 [file biomedicines-10-00856-s001.zip › biomedicines-1642626-supplementary.pdf]

**Supplementary to the Manuscript „The impact of prolonged inflammation on wound healing”, Holzer-Geissler et al.**

Composition and parameters of the wound scores used for the present study.

Inflammation score

**Supplementary Table S1 – Inflammation Score.** The inflammation score evaluates the presence of pus, erythema and swelling, as well as the width of the erythema giving extra points. The scoring of erythema is adapted from the scoring scheme of Halin et al (American Journal of Pathology 2008, (1)) and the inflammation score adapted from the wound score of Matsui et al (Wound Repair and Regeneration 2011, (2)).

| Parameter      | Phenotype  | Score |
|----------------|------------|-------|
| Pus            | None       | 0     |
|                | Present    | 1     |
| Erythema       | None       | 0     |
|                | Mild       | 1     |
|                | Moderate   | 2     |
|                | Pronounced | 3     |
|                | Severe     | 4     |
| Erythema Width | <5mm       | 0     |
|                | ≥5mm       | 1     |
| Swelling       | None       | 0     |
|                | Mild       | 1     |
|                | Severe     | 2     |

## Pus

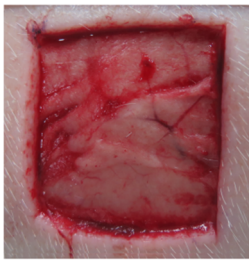

Pus was  
never  
recorded  
(Score 1)

None  
(Score 0)

## Erythema

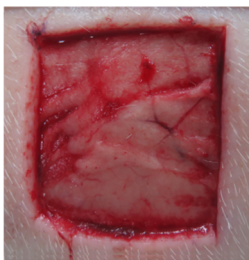

None  
(Score 0)

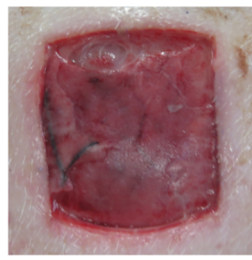

Mild  
(Score 1)

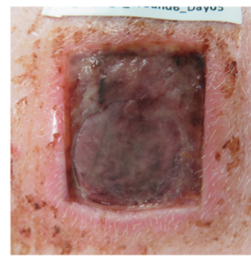

Moderate  
(Score 2)

Pronounced  
erythema  
was never  
recorded  
(Score 3)

Severe  
erythema  
was never  
recorded  
(Score 4)

## Swelling

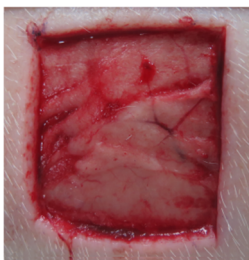

None  
(Score 0)

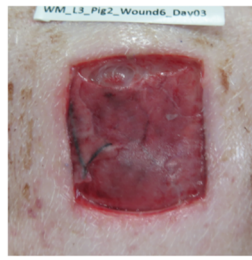

Mild  
(Score 1)

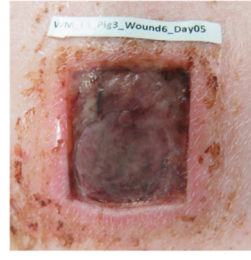

Severe  
(Score 2)

**Supplementary Figure S1 – Inflammation Score.** Representative pictures of the wounds to exemplify the scoring scheme and points given of the inflammation score.

**Supplementary Table S2 – Area Score.** The area score evaluates the state of the wound, rating it as dry or moist, and the size. The presence and amount of granulation tissue as well as necrosis is scored. The area score is adapted from the wound score of Matsui et al (Wound Repair and Regeneration 2011, (2)).

| Parameter          | Phenotype      | Score |
|--------------------|----------------|-------|
| Wound              | Dry            | 0     |
|                    | Moist          | 1     |
| Size               | ≤25 mm         | 0     |
|                    | ≤30 mm         | 1     |
|                    | ≤35 mm         | 2     |
|                    | >35 mm         | 3     |
| Granulation tissue | Covering wound | 0     |
|                    | Moderate       | 1     |
|                    | None           | 2     |
| Scab               | Fallen off     | 0     |
|                    | Moderate       | 1     |
|                    | Mild           | 2     |
|                    | None           | 3     |
| Necrosis           | None           | 0     |
|                    | Mild           | 1     |
|                    | Moderate       | 2     |
|                    | Pronounced     | 3     |
|                    | Severe         | 4     |

## Wound

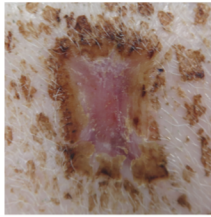

Dry  
(Score 0)

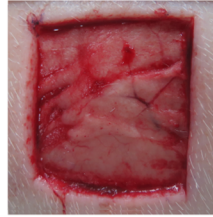

Moist  
(Score 1)

## Granulation

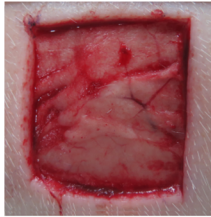

None  
(Score 2)

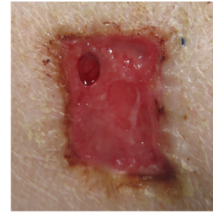

Moderate  
(Score 1)

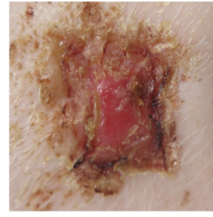

Covering wound  
(Score 0)

## Scab

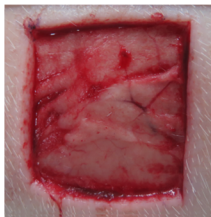

None  
(Score 3)

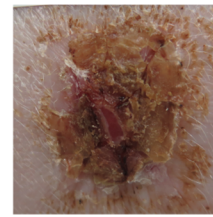

Mild  
(Score 2)

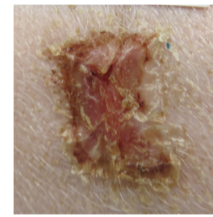

Moderate  
(Score 1)

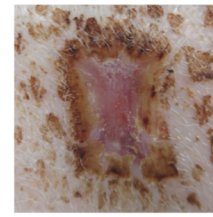

Fallen off  
(Score 0)

## Necrosis

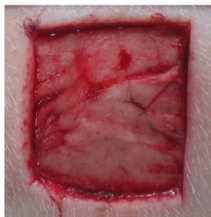

None  
(Score 0)

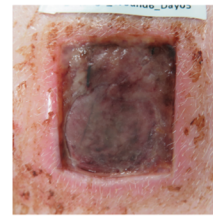

Mild  
(Score 1)

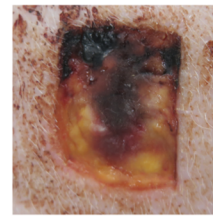

Moderate  
(Score 2)

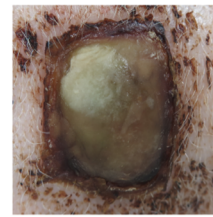

Pronounced  
(Score 3)

Severe  
necrosis  
was never  
recorded  
(Score 4)

**Supplementary Figure S2 – Area Score.** Representative pictures of the wounds to exemplify the scoring scheme and points given of the area score.
